## SUPPLEMENTARY MATERIAL

**Table S1:** Summary of potentially adaptive differences between sites within each region. Data are given as the difference of the means of the two populations, northern population minus southern in each pair.  $CT_{max}$  = critical thermal maximum;  $f_{H,0}$  = heart rate at 0°C; p = p-value for comparison, after multiple test correction in the East Coast. Significant values ( $p < 0.05$ ) are indicated in bold.

|                     |         | $CT_{max}$ (°C) |              |              |                  |             |             | $f_{H,0}$ (beats 30 s <sup>-1</sup> ) |                  |              |                  |             |              |
|---------------------|---------|-----------------|--------------|--------------|------------------|-------------|-------------|---------------------------------------|------------------|--------------|------------------|-------------|--------------|
| <b>Acclimation:</b> |         | <b>5°C</b>      |              | <b>Field</b> |                  | <b>25°C</b> |             | <b>5°C</b>                            |                  | <b>Field</b> |                  | <b>25°C</b> |              |
| Coast               | Sites   | diff.           | p            | diff.        | p                | diff.       | p           | diff.                                 | p                | diff.        | p                | diff.       | p            |
| Europe              | NO - PT | <b>-1.4</b>     | <b>0.03</b>  | <b>-3.5</b>  | <b>&lt;0.001</b> | <b>-1.3</b> | <b>0.03</b> | <b>8.1</b>                            | <b>&lt;0.001</b> | <b>4.4</b>   | <b>&lt;0.001</b> | <b>2.8</b>  | <b>0.002</b> |
| East                | NL - NJ | -1.6            | 0.05         | <b>-2.1</b>  | <b>0.04</b>      | 0.2         | 0.5         | <b>3.8</b>                            | <b>&lt;0.001</b> | <b>8.2</b>   | <b>0.002</b>     | 1.4         | 0.6          |
| East                | NL - ME | <b>-1.0</b>     | <b>0.03</b>  | -1.2         | 0.09             | -0.5        | 0.1         | 1.0                                   | 0.2              | <b>7.0</b>   | <b>&lt;0.001</b> | 0.5         | 0.6          |
| East                | ME - NJ | -0.7            | 0.4          | -0.9         | 0.3              | 0.7         | 0.5         | <b>2.8</b>                            | <b>0.001</b>     | 1.2          | 0.4              | 0.9         | 0.6          |
| West                | BC - CA | <b>5.2</b>      | <b>0.008</b> | 1.2          | 0.3              | -0.9        | 0.3         | -2.0                                  | 0.07             | -2.2         | 0.6              | 0.8         | 0.6          |

**Table S2:** Species used in crustacean CT<sub>max</sub> comparison (Fig. 4), along with details on studies and experimental conditions. When a species has been tested at more than one acclimation temperature, acclimation temperatures resulting in the highest and lowest CT<sub>max</sub> values have been listed. Accl. = acclimation temperature.

| Species                         | Location          | Tidal height    | Accl. (°C)         | CT <sub>max</sub> (°C) | Reference                                      |
|---------------------------------|-------------------|-----------------|--------------------|------------------------|------------------------------------------------|
| <i>Homarus americanus</i>       | Not specified     | Subtidal        | 4-5                | 21.2                   | Camacho et al. 2006                            |
|                                 |                   | Subtidal        | 20-22              | 24.2                   | Camacho et al. 2006                            |
| <i>Homarus americanus</i>       | Maine, USA        | Subtidal        | 12-15 <sup>1</sup> | 30                     | Jost et al. 2012                               |
| <i>Cancer irroratus</i>         | Maine, USA        | Subtidal        | 12-15 <sup>1</sup> | 28                     | Jost et al. 2012                               |
| <i>Maja squinado</i>            | France (Atlantic) | Subtidal        | 10                 | 31.5                   | Frederich and Pörtner 2000                     |
| <i>Mimulus foliatus</i>         | California, USA   | Subtidal        | Field              | 27.5                   | John Thiemer and GNS, unpublished observations |
| <i>Pugettia richii</i>          | California, USA   | Subtidal        | Field              | 27.1                   | John Thiemer and GNS, unpublished observations |
| <i>Scyra acutifrons</i>         | California, USA   | Subtidal        | Field              | 28.1                   | John Thiemer and GNS, unpublished observations |
| <i>Carcinus maenas</i>          | Various           | Low intertidal  | 5                  | 34.5                   | This study                                     |
|                                 |                   |                 | 25                 | 36.5                   | This study                                     |
| <i>Petrolisthes eriomerus</i>   | Oregon, USA       | Low intertidal  | 8                  | 28.3                   | Stillman 2004                                  |
|                                 |                   |                 | 18                 | 30.4                   | Stillman 2004                                  |
| <i>Petrolisthes manimaculis</i> | California, USA   | Low intertidal  | 8                  | 28.4                   | Stillman 2004                                  |
|                                 |                   |                 | 18                 | 31.9                   | Stillman 2004                                  |
| <i>Hemigrapsus nudus</i>        | California, USA   | High intertidal | Field              | 33.8                   | John Thiemer and GNS, unpublished observations |
| <i>Pachygrapsus crassipes</i>   | California, USA   | High intertidal | Field              | 34.8                   | John Thiemer and GNS, unpublished observations |
| <i>Petrolisthes cinctipes</i>   | Oregon, USA       | High intertidal | 8                  | 32.6                   | Stillman 2004                                  |
|                                 |                   |                 | 22                 | 33.9                   | Stillman 2004                                  |
| <i>Petrolisthes cabrilloi</i>   | California, USA   | High intertidal | 8                  | 32.5                   | Stillman 2004                                  |
|                                 |                   |                 | 18                 | 34.8                   | Stillman 2004                                  |

<sup>1</sup>Animals held in flow-through seawater system.

**Figure S1:** Representative traces of filtered heart rate data at different temperatures. Traces at 0°C, 5°C, 10°C, and 15°C are from a single individual tested for cold tolerance; traces at 20°C, 25°C, 30°C, and 35°C are from a single individual tested for heat tolerance. Both individuals were from the Maine population, and were acclimated to 5°C before thermal tolerance testing.

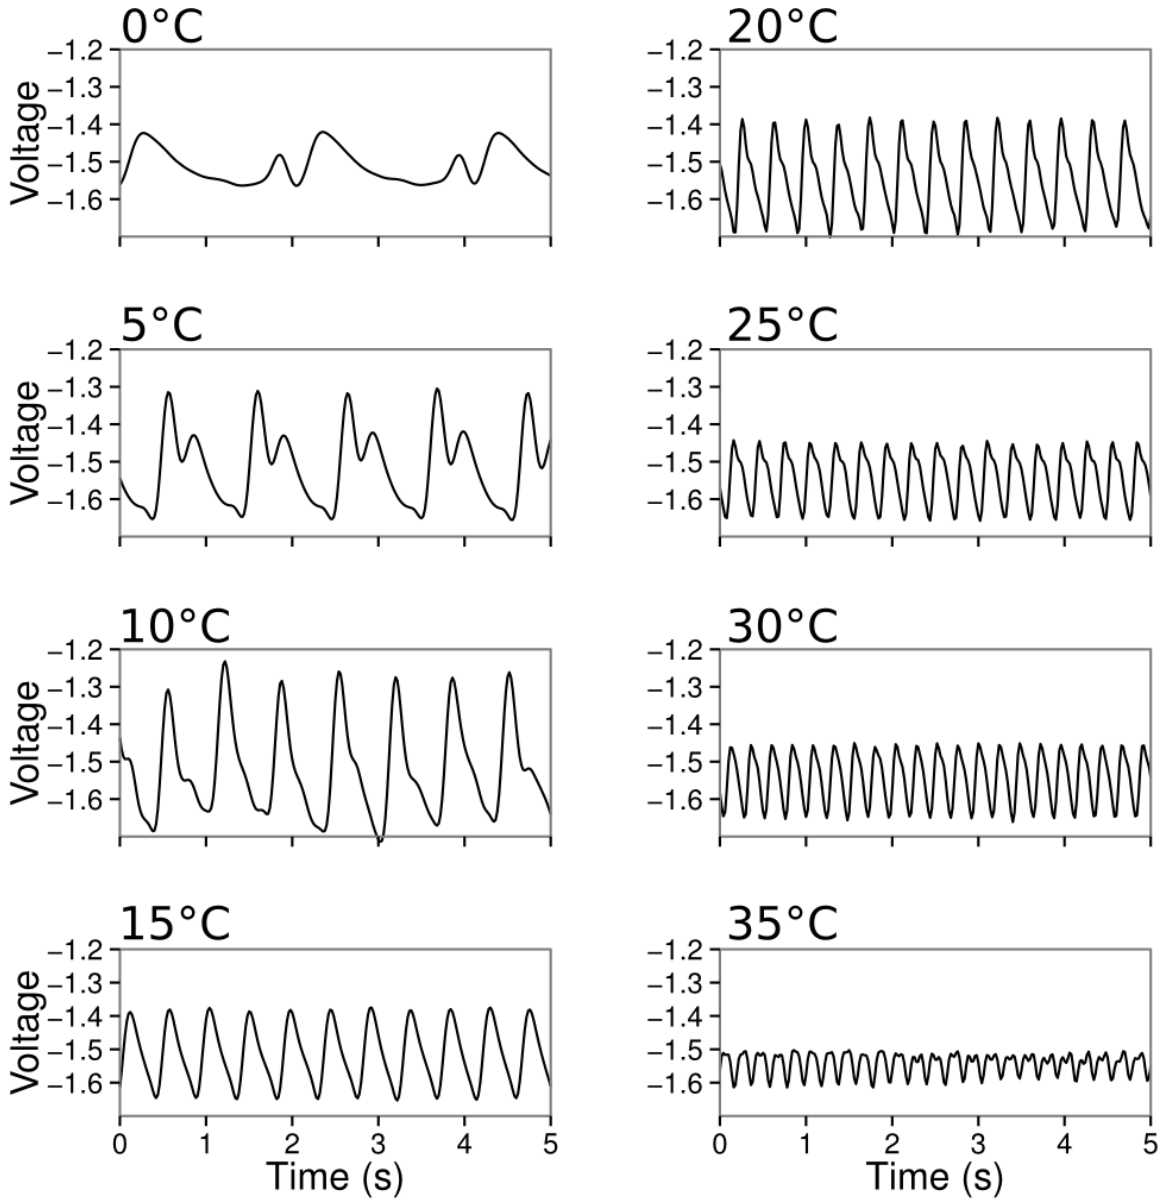

**Figure S2:** Representative traces of heart rate versus temperature for individual green crabs. A: High-temperature test showing  $CT_{max}$ . B: Low-temperature test showing relationship between heart rate and temperature.

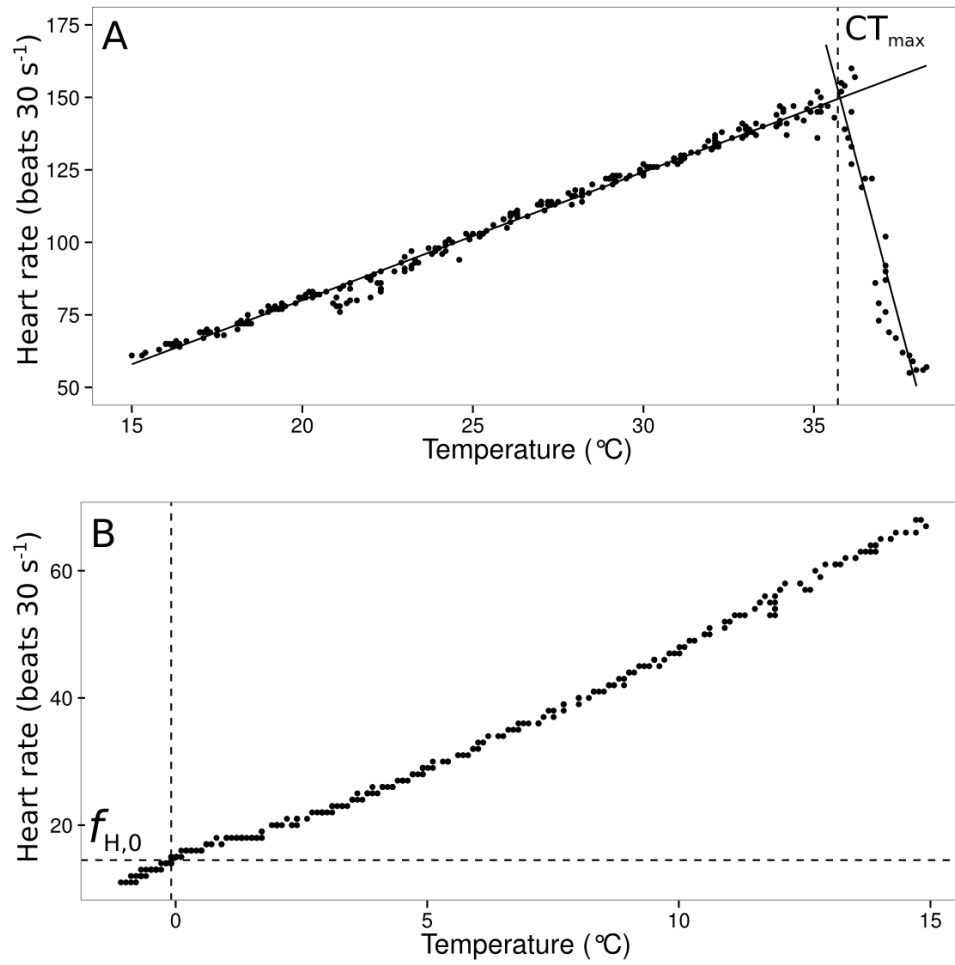

**Figure S3:** High and low temperature tolerance at site CA at two different times: April 2011 (full data set used in this study) and October 2010 (preliminary data set; N = 4 for each sample group). There were no significant differences between crabs sampled at different times after acclimation. ns = not significant.

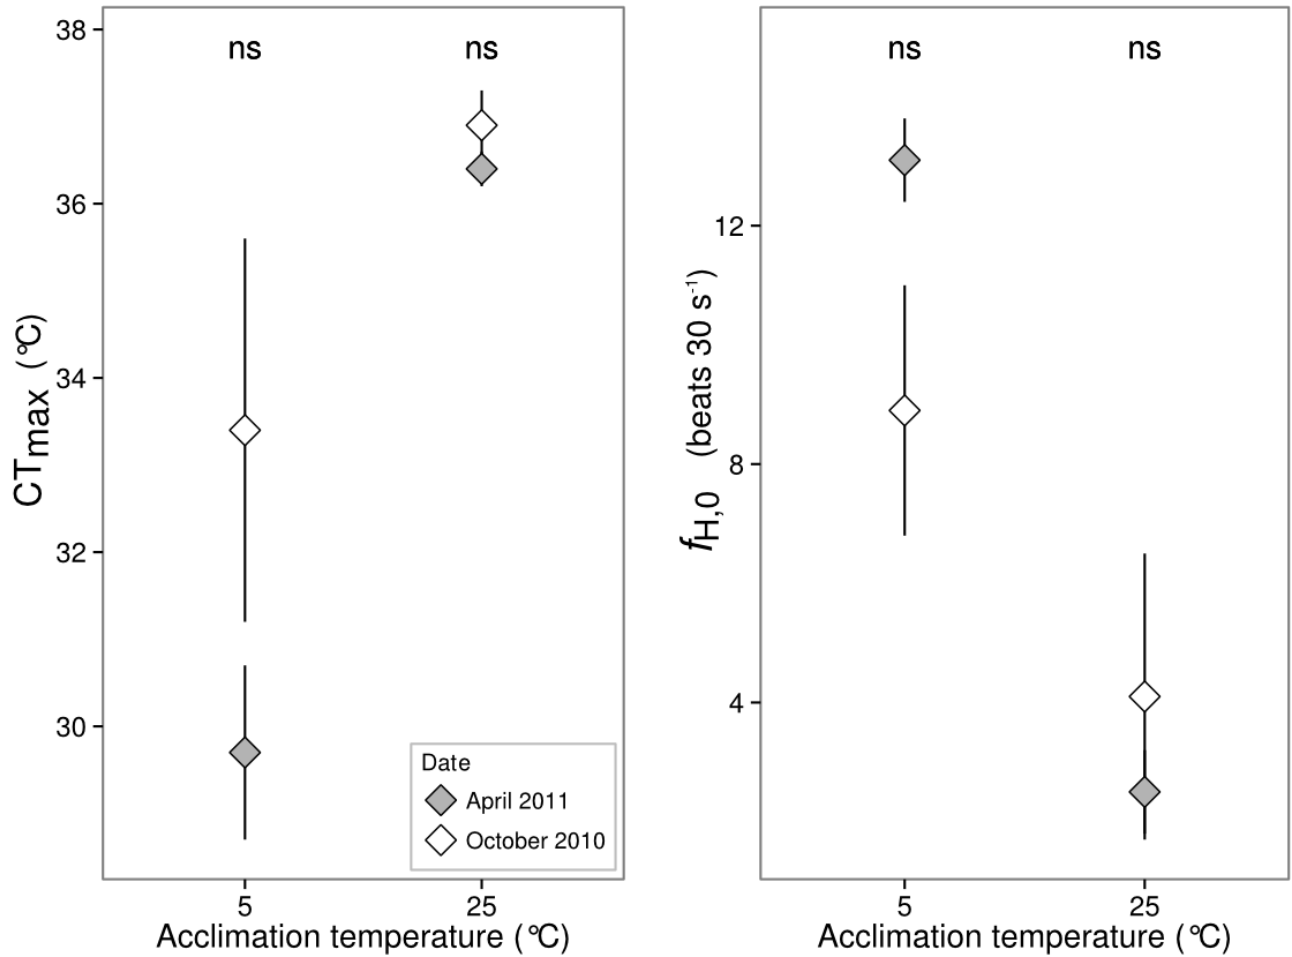

Source: https://cob.silverchair-cdn.com/cob/content_public/journal/jeb/217/7/10.1242_jeb.093849/6/jeb093849.pdf
